# Supplementary material for: Theoretical study on the stability of osmasilabenzynes
Source: Royal Society of Chemistry journal article supplement (doi:10.1039/c3dt53528b), 2014-01-01
Supplement: c3dt53528b1.pdf [file c3dt53528b1.pdf]

# Supporting Information

## Theoretical Study on the Stability of Osmasilbenzynes

Ying Huang,<sup>a</sup> Xuerui Wang,<sup>a</sup> Ke An,<sup>a</sup> Jinglan Fan,<sup>a</sup> and Jun Zhu\*<sup>a,b</sup>

<sup>a</sup>State Key Laboratory of Physical Chemistry of Solid Surfaces, Fujian Provincial Key Laboratory of Theoretical and Computational Chemistry and Department of Chemistry, College of Chemistry and Chemical Engineering, Xiamen University, Xiamen 361005 (P. R. China).

<sup>b</sup>Laboratory of Computational Chemistry and Drug Design Laboratory of Chemical Genomics  
Peking University Shenzhen Graduate Shenzhen 518055(P. R. China)

jun.zhu@xmu.edu.cn

Cartesian coordinates and electronic energies (in Hartree) for all the complexes calculated in this study

### Osmium–Silicon Triple Bond

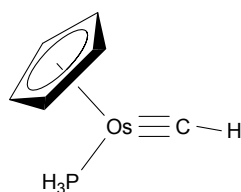

E: -331.558427

|    |           |           |           |
|----|-----------|-----------|-----------|
| Os | 0.139213  | -0.318871 | -0.000061 |
| C  | -2.064359 | -0.605986 | 0.000374  |
| C  | -1.773146 | 0.184818  | 1.169339  |
| C  | -1.773579 | 0.184411  | -1.168980 |
| H  | -2.478649 | -1.605067 | 0.000625  |
| C  | -1.309837 | 1.451075  | 0.715660  |
| H  | -1.920310 | -0.112439 | 2.197676  |
| C  | -1.310090 | 1.450807  | -0.715937 |
| H  | -1.921100 | -0.113228 | -2.197155 |
| H  | -0.987003 | 2.264887  | 1.351009  |
| H  | -0.987358 | 2.264338  | -1.351695 |

|   |          |           |           |
|---|----------|-----------|-----------|
| P | 2.042971 | 0.959567  | 0.000026  |
| H | 2.995127 | 0.920231  | 1.068955  |
| H | 3.000231 | 0.912407  | -1.063840 |
| H | 1.834939 | 2.370625  | -0.005410 |
| C | 1.130564 | -1.746806 | 0.000176  |
| H | 1.842052 | -2.570959 | 0.000266  |

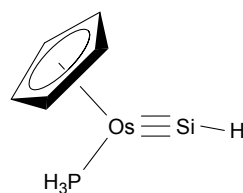

E: -297.354101

|    |           |           |           |
|----|-----------|-----------|-----------|
| Os | 0.089729  | -0.143507 | -0.000030 |
| Si | 1.692269  | -1.587388 | -0.000007 |
| C  | -1.945097 | -1.066786 | -0.000300 |
| C  | -1.845968 | -0.232844 | 1.168951  |
| C  | -1.846057 | -0.232149 | -1.169069 |
| H  | -2.093969 | -2.137379 | -0.000613 |

|   |           |           |           |
|---|-----------|-----------|-----------|
| C | -1.677458 | 1.109903  | 0.723177  |
| H | -1.905676 | -0.561207 | 2.196615  |
| C | -1.677532 | 1.110321  | -0.722498 |
| H | -1.905800 | -0.559919 | -2.196919 |
| H | -1.581677 | 1.978887  | 1.359477  |
| H | -1.581664 | 1.979662  | -1.358300 |
| P | 1.575156  | 1.606802  | 0.000006  |
| H | 2.500238  | 1.868615  | 1.063101  |
| H | 2.499373  | 1.869410  | -1.063656 |
| H | 0.965072  | 2.901437  | 0.000719  |
| H | 2.918282  | -2.442233 | 0.000276  |

|    |           |           |           |
|----|-----------|-----------|-----------|
| H  | 0.595328  | 3.044360  | -1.283718 |
| Cl | 2.235196  | 0.000601  | -1.473917 |
| Cl | 1.624492  | -0.001064 | 1.954846  |
| H  | -0.860735 | -0.000822 | 2.366444  |
| H  | -3.149194 | -0.001016 | 2.416013  |
| Si | -1.596011 | 0.000576  | -1.334920 |
| H  | -4.671541 | -0.000396 | 0.629802  |

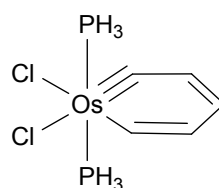

### Structure Aspect of Osasilabenzynesilene

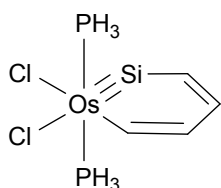

E: -296.366447

|    |           |           |           |
|----|-----------|-----------|-----------|
| C  | -3.341738 | 0.000386  | -1.021010 |
| C  | -3.617059 | -0.000212 | 0.342971  |
| C  | -2.691004 | -0.000598 | 1.427326  |
| C  | -1.307354 | -0.000479 | 1.369537  |
| H  | -4.147759 | 0.000648  | -1.745681 |
| Os | 0.181858  | 0.000067  | -0.056642 |
| P  | 0.571596  | -2.349228 | -0.045939 |
| P  | 0.571682  | 2.349328  | -0.044207 |
| H  | 1.840355  | -2.702787 | 0.476533  |
| H  | -0.268431 | -3.225603 | 0.701207  |
| H  | 0.593515  | -3.043814 | -1.285744 |
| H  | -0.269262 | 3.225493  | 0.702165  |
| H  | 1.839766  | 2.702601  | 0.480131  |

E: -330.583645

|    |           |           |           |
|----|-----------|-----------|-----------|
| C  | -3.425977 | 0.031970  | -0.157515 |
| C  | -2.809612 | -0.095086 | 1.110751  |
| C  | -1.435842 | -0.120699 | 1.300800  |
| Os | 0.049064  | 0.009245  | -0.082606 |
| P  | 0.429148  | -2.345037 | -0.226329 |
| P  | 0.465153  | 2.349077  | 0.167782  |
| H  | 1.802311  | -2.680888 | -0.272144 |
| H  | -0.033631 | -3.180036 | 0.826968  |
| H  | -0.066738 | -3.066926 | -1.349116 |
| H  | -0.269866 | 3.109201  | 1.122389  |
| H  | 1.794948  | 2.638989  | 0.552896  |
| H  | 0.315604  | 3.178213  | -0.976417 |
| Cl | 1.547190  | -0.250209 | 1.919195  |
| H  | -1.104703 | -0.222360 | 2.335823  |
| H  | -3.467895 | -0.175661 | 1.974056  |
| H  | -4.514057 | 0.040951  | -0.207124 |
| C  | -1.350006 | 0.126685  | -1.168604 |
| C  | -2.712779 | 0.147864  | -1.355941 |

H -3.194210 0.243746 -2.323621  
 Cl 2.099880 0.180042 -1.501807

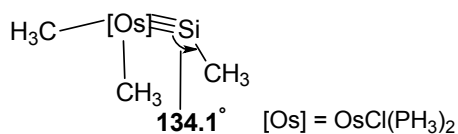

E: -221.375971

C -3.740577 -0.039124 -0.062803  
 C -1.175058 -0.049357 1.836988  
 H -4.566999 -0.028139 -0.779127  
 Os 0.012211 -0.006218 -0.021813  
 P 0.422481 -2.344405 0.010817  
 P 0.270740 2.352426 -0.004336  
 H 1.769744 -2.683048 0.294640  
 H -0.244779 -3.186754 0.951369  
 H 0.214146 -3.111224 -1.169389  
 H -0.405140 3.143406 0.973862  
 H 1.604746 2.778924 0.215217  
 H -0.045603 3.111556 -1.165921  
 Cl 1.675730 0.036269 -1.874895  
 Cl 1.844956 0.075480 1.610329  
 H -0.444034 -0.069566 2.647328  
 Si -2.021282 -0.056774 -0.832744  
 H -1.808063 0.834199 1.991213  
 H -1.816277 -0.932756 1.954818  
 H -3.809736 0.846243 0.580231  
 H -3.834275 -0.924620 0.577234

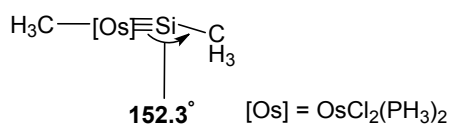

E: -221.379625

C 3.902837 -0.029522 0.159486  
 C 0.973702 -0.058909 -1.998686  
 H 4.405142 0.856137 0.565425  
 Os -0.001961 0.001297 -0.010657  
 P -0.402343 -2.338604 0.060979  
 P -0.356246 2.347258 -0.046955  
 H -1.775516 -2.674582 0.150337  
 H -0.010455 -3.162454 -1.037173  
 H 0.115851 -3.126945 1.127762  
 H 0.204137 3.156274 -1.082570  
 H -1.721087 2.710490 -0.164996  
 H 0.017747 3.131618 1.079734  
 Cl -1.470840 0.078773 2.019685  
 Cl -2.042701 -0.045683 -1.394780  
 H 0.146638 -0.065580 -2.711961  
 Si 2.072450 0.001767 0.559316  
 H 1.601969 0.811892 -2.229347  
 H 1.577904 -0.956750 -2.185595  
 H 4.041884 -0.051211 -0.927801  
 H 4.380300 -0.913946 0.597098

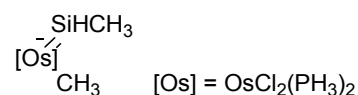

E: -222.087586

C 3.712633 -0.191365 -0.006377  
 C -0.252173 -0.055679 -2.310469  
 H 4.206635 -0.455164 0.939092  
 Os -0.081903 -0.037313 -0.152844  
 P -1.122048 -2.107508 -0.001934  
 P 0.675308 2.156246 -0.180780  
 H -2.227592 -2.240948 0.888546  
 H -1.738771 -2.685435 -1.162751

|                                                          |             |           |           |    |                                                          |           |           |
|----------------------------------------------------------|-------------|-----------|-----------|----|----------------------------------------------------------|-----------|-----------|
| H                                                        | -0.410728   | -3.285766 | 0.404571  | Cl | -2.000367                                                | -0.813120 | 1.622383  |
| H                                                        | 1.175509    | 2.757611  | -1.388599 | Cl | -1.933280                                                | 1.264904  | -1.423395 |
| H                                                        | -0.271177   | 3.173716  | 0.147709  | H  | 0.704852                                                 | 1.212479  | -2.210539 |
| H                                                        | 1.734142    | 2.605513  | 0.672346  | H  | 3.030297                                                 | 1.261187  | -2.251944 |
| Cl                                                       | -0.297995   | 0.214184  | 2.435405  | Si | 1.534965                                                 | -1.008605 | 1.057430  |
| Cl                                                       | -2.470292   | 0.906025  | -0.228061 | H  | 4.568503                                                 | 0.268564  | -0.802813 |
| H                                                        | -1.235751   | 0.355189  | -2.566422 | H  | 1.545386                                                 | -2.008912 | 2.200175  |
| Si                                                       | 1.953067    | -0.932967 | -0.055328 |    | [Os] = OsCl <sub>2</sub> (PH <sub>3</sub> ) <sub>2</sub> |           |           |
| H                                                        | 2.276743    | -2.410514 | 0.050663  | E: | -221.379626                                              |           |           |
| H                                                        | 0.510930    | 0.555618  | -2.816264 | C  | 3.903341                                                 | -0.035198 | 0.159272  |
| H                                                        | -0.185740   | -1.061712 | -2.751602 | C  | 0.971205                                                 | -0.072951 | -1.999505 |
| H                                                        | 3.712771    | 0.900097  | -0.096005 | H  | 4.406992                                                 | 0.853233  | 0.557414  |
| H                                                        | 4.333990    | -0.603200 | -0.813635 | Os | -0.001649                                                | 0.001497  | -0.010609 |
|                                                          |             |           |           | P  | -0.407407                                                | -2.337257 | 0.072616  |
| [Os] = OsCl <sub>2</sub> (PH <sub>3</sub> ) <sub>2</sub> |             |           |           | P  | -0.352265                                                | 2.347519  | -0.060942 |
| E:                                                       | -297.076780 |           |           | H  | -1.779472                                                | -2.668658 | 0.190514  |
| C                                                        | 3.257384    | -0.673547 | 0.588827  | H  | -0.040415                                                | -3.160965 | -1.033989 |
| C                                                        | 3.513837    | 0.118980  | -0.524300 | H  | 0.129853                                                 | -3.128727 | 1.127834  |
| C                                                        | 2.575239    | 0.732324  | -1.409142 | H  | 0.219273                                                 | 3.152474  | -1.093706 |
| C                                                        | 1.175457    | 0.707668  | -1.343435 | H  | -1.715535                                                | 2.711551  | -0.194534 |
| H                                                        | 4.120882    | -1.097701 | 1.105630  | H  | 0.010920                                                 | 3.135186  | 1.066863  |
| Os                                                       | -0.166401   | 0.008905  | -0.033245 | Cl | -1.468375                                                | 0.097214  | 2.020594  |
| P                                                        | -0.938752   | -1.880621 | -1.198323 | Cl | -2.044498                                                | -0.056534 | -1.391774 |
| P                                                        | -0.075930   | 1.922194  | 1.322531  | H  | 0.143244                                                 | -0.083205 | -2.711703 |
| H                                                        | -2.314284   | -1.810206 | -1.667235 | Si | 2.072924                                                 | 0.002806  | 0.558211  |
| H                                                        | -0.316074   | -2.336649 | -2.428719 | H  | 1.600429                                                 | 0.795404  | -2.236654 |
| H                                                        | -0.987785   | -3.144735 | -0.514826 | H  | 1.573933                                                 | -0.972811 | -2.181386 |
| H                                                        | 1.118327    | 2.756057  | 1.409406  | H  | 4.042624                                                 | -0.066651 | -0.927757 |
| H                                                        | -1.031342   | 2.969570  | 1.036222  | H  | 4.379229                                                 | -0.916523 | 0.604749  |
| H                                                        | -0.321049   | 1.757573  | 2.729579  |    |                                                          |           |           |

#### The aromaticity of Osmasilabenzynes

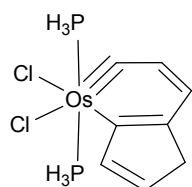

E: -446.101589

|    |           |           |           |
|----|-----------|-----------|-----------|
| C  | 2.659925  | -0.509166 | 0.057858  |
| C  | 1.548889  | 0.365458  | -0.099374 |
| C  | 1.372039  | -2.579404 | 0.481567  |
| C  | 2.587267  | -1.876508 | 0.328152  |
| H  | 1.328632  | -3.642362 | 0.693040  |
| H  | 3.515616  | -2.438902 | 0.425693  |
| C  | 2.112854  | 1.688049  | -0.380356 |
| C  | 3.466474  | 1.645833  | -0.394598 |
| C  | 3.954548  | 0.257265  | -0.119001 |
| H  | 1.500341  | 2.563611  | -0.547878 |
| H  | 4.595121  | 0.220245  | 0.775659  |
| Os | -0.438417 | -0.165645 | 0.038756  |
| P  | -0.656027 | 0.520758  | 2.310000  |
| H  | -1.952580 | 0.981153  | 2.645742  |
| H  | -0.427678 | -0.415143 | 3.360753  |
| H  | 0.150019  | 1.598687  | 2.766554  |
| P  | -0.831548 | -0.449693 | -2.298474 |
| H  | -1.333225 | -1.704450 | -2.736990 |
| H  | -1.805826 | 0.436245  | -2.816956 |
| H  | 0.221856  | -0.266887 | -3.242526 |
| Cl | -1.027395 | 2.258887  | -0.337568 |
| Cl | -2.900915 | -0.583924 | 0.093223  |
| C  | 0.285871  | -1.764773 | 0.331871  |
| H  | 4.127600  | 2.487230  | -0.577438 |
| H  | 4.567472  | -0.131253 | -0.946842 |

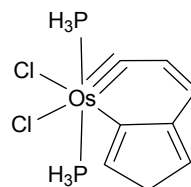

E: -446.081892

|    |           |           |           |
|----|-----------|-----------|-----------|
| C  | 2.708206  | -0.528640 | -0.000442 |
| C  | 1.561204  | 0.442373  | -0.000233 |
| C  | 1.391499  | -2.623323 | -0.001209 |
| C  | 2.597152  | -1.964541 | -0.000862 |
| H  | 1.306820  | -3.705881 | -0.001578 |
| H  | 3.518543  | -2.545136 | -0.000928 |
| C  | 2.117906  | 1.679039  | 0.000028  |
| C  | 3.625413  | 1.608483  | -0.000098 |
| C  | 3.899107  | 0.139495  | -0.000338 |
| H  | 1.575211  | 2.615200  | 0.000380  |
| H  | 4.077314  | 2.102462  | -0.876052 |
| H  | 4.888292  | -0.307343 | -0.000471 |
| H  | 4.077390  | 2.102214  | 0.875953  |
| Os | -0.470120 | -0.186022 | -0.000182 |
| P  | -0.684360 | 0.098932  | 2.361472  |
| H  | 0.245619  | 0.953533  | 3.015761  |
| H  | -1.917704 | 0.665496  | 2.764713  |
| H  | -0.623961 | -1.034269 | 3.223219  |
| P  | -0.686235 | 0.102121  | -2.361366 |
| H  | -1.920132 | 0.668894  | -2.762622 |
| H  | 0.242866  | 0.957771  | -3.015565 |
| H  | -0.626394 | -1.029963 | -3.224584 |
| Cl | -1.053314 | 2.256937  | 0.002410  |
| Cl | -2.925084 | -0.623545 | -0.000069 |
| C  | 0.279008  | -1.767682 | -0.001142 |

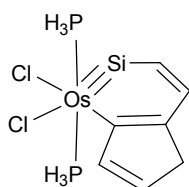

E: -411.877854

|    |           |           |           |
|----|-----------|-----------|-----------|
| C  | -2.742975 | -0.163904 | 0.020616  |
| C  | -1.497483 | 0.522825  | -0.032906 |
| C  | -2.153262 | -2.631000 | -0.173080 |
| C  | -3.026582 | -1.543175 | -0.024020 |
| H  | -2.538654 | -3.641849 | -0.221690 |
| H  | -4.089264 | -1.793663 | 0.038563  |
| C  | -1.856495 | 1.951455  | -0.096283 |
| C  | -3.194450 | 2.139651  | -0.046019 |
| C  | -3.893712 | 0.827310  | 0.052991  |
| H  | -1.119612 | 2.739142  | -0.156824 |
| H  | -4.604960 | 0.675401  | -0.773746 |
| Os | 0.500581  | -0.128167 | -0.033765 |
| P  | 0.926069  | 0.428800  | -2.304892 |
| H  | 1.784162  | 1.547798  | -2.461388 |
| H  | 1.590936  | -0.523320 | -3.123134 |
| H  | -0.129741 | 0.803510  | -3.189235 |
| P  | 0.681842  | -0.285590 | 2.334402  |
| H  | 0.481845  | -1.511652 | 3.035474  |
| H  | 1.964152  | 0.069655  | 2.822107  |
| H  | -0.150811 | 0.560036  | 3.117296  |
| Cl | 1.166583  | 2.200002  | 0.560016  |
| Cl | 2.948500  | -0.612454 | -0.092154 |
| H  | -3.705052 | 3.097221  | -0.069163 |
| H  | -4.484738 | 0.747062  | 0.979275  |
| Si | -0.494838 | -2.056004 | -0.288250 |

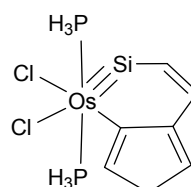

E: -411.861551

|    |           |           |           |
|----|-----------|-----------|-----------|
| C  | 2.831957  | -0.182244 | 0.031861  |
| C  | 1.518095  | 0.570149  | -0.028962 |
| Si | 0.490846  | -2.034825 | -0.242216 |
| C  | 2.188902  | -2.624001 | -0.121305 |
| C  | 3.093684  | -1.605217 | 0.015002  |
| H  | 2.520976  | -3.656399 | -0.152140 |
| H  | 4.150478  | -1.870660 | 0.095615  |
| C  | 1.878878  | 1.881094  | -0.087076 |
| C  | 3.369784  | 2.081113  | -0.038703 |
| C  | 3.885115  | 0.687302  | 0.044055  |
| H  | 1.195630  | 2.717466  | -0.127635 |
| H  | 3.764532  | 2.603314  | -0.925812 |
| H  | 4.934652  | 0.412523  | 0.081446  |
| H  | 3.687954  | 2.689754  | 0.823554  |
| Os | -0.543887 | -0.140283 | -0.027056 |
| P  | -0.680769 | -0.183082 | 2.343834  |
| H  | -1.952658 | 0.180234  | 2.856202  |
| H  | -0.449360 | -1.365509 | 3.110180  |
| H  | 0.162518  | 0.713548  | 3.056352  |
| P  | -0.837125 | 0.389908  | -2.323579 |
| H  | -1.535275 | -0.518258 | -3.166085 |
| H  | -1.600513 | 1.567039  | -2.541932 |
| H  | 0.286229  | 0.673219  | -3.156345 |
| Cl | -1.168274 | 2.201107  | 0.470489  |
| Cl | -2.980648 | -0.609860 | -0.099851 |

**Effect of the Substituents on the Stabilization for Osmasilabenyne**

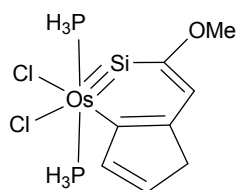

E: -526.386519

|    |           |           |           |
|----|-----------|-----------|-----------|
| C  | -2.070389 | 1.394378  | 0.067410  |
| C  | -0.663472 | 1.353096  | -0.020181 |
| C  | -2.846831 | -1.016644 | -0.098815 |
| C  | -3.038028 | 0.352573  | 0.061631  |
| C  | -0.243326 | 2.765403  | -0.117022 |
| C  | -1.294850 | 3.611480  | -0.055457 |
| C  | -2.559589 | 2.833182  | 0.087821  |
| H  | 0.790567  | 3.065352  | -0.208091 |
| H  | -3.269837 | 3.045397  | -0.726561 |
| Os | 0.728409  | -0.236813 | -0.038663 |
| P  | 1.383363  | 0.091383  | -2.299444 |
| H  | 2.688258  | 0.631210  | -2.438909 |
| H  | 1.484903  | -1.046671 | -3.143896 |
| H  | 0.661964  | 0.967038  | -3.164925 |
| P  | 0.779411  | -0.518358 | 2.323205  |
| H  | 0.029309  | -1.535402 | 2.984309  |
| H  | 2.073741  | -0.803921 | 2.824145  |
| H  | 0.413862  | 0.592999  | 3.131324  |
| Cl | 2.453048  | 1.427183  | 0.615259  |
| H  | -1.250371 | 4.694868  | -0.096259 |
| H  | -3.088471 | 3.076305  | 1.023346  |
| Si | -1.109981 | -1.389593 | -0.310183 |
| Cl | 2.597013  | -1.886025 | -0.119301 |
| H  | -4.069267 | 0.694676  | 0.164845  |

|   |           |           |           |
|---|-----------|-----------|-----------|
| O | -3.825697 | -1.976119 | -0.129356 |
| C | -5.177768 | -1.549649 | -0.048019 |
| H | -5.439625 | -0.878751 | -0.877768 |
| H | -5.780247 | -2.457380 | -0.111928 |
| H | -5.385660 | -1.042652 | 0.904228  |

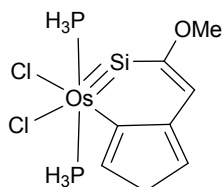

E: -526.375734

|    |           |           |           |
|----|-----------|-----------|-----------|
| C  | 2.167774  | 1.433374  | 0.088872  |
| C  | 0.657128  | 1.399324  | -0.020961 |
| Si | 1.096974  | -1.353084 | -0.338384 |
| C  | 2.869672  | -0.982012 | -0.116592 |
| C  | 3.128430  | 0.344471  | 0.086840  |
| H  | 4.163227  | 0.659429  | 0.222452  |
| C  | 0.286273  | 2.705329  | -0.105172 |
| C  | 1.453956  | 3.649314  | -0.012611 |
| C  | 2.613133  | 2.722090  | 0.119153  |
| H  | -0.730590 | 3.064931  | -0.176085 |
| H  | 1.552644  | 4.296506  | -0.899675 |
| H  | 3.650730  | 3.033528  | 0.186632  |
| H  | 1.366551  | 4.336475  | 0.844734  |
| Os | -0.755469 | -0.259444 | -0.040597 |
| P  | -0.769214 | -0.505020 | 2.322913  |
| H  | -2.042044 | -0.826634 | 2.859110  |
| H  | 0.024461  | -1.478688 | 3.001792  |
| H  | -0.430325 | 0.639526  | 3.095902  |
| P  | -1.335358 | 0.187281  | -2.302239 |
| H  | -1.548841 | -0.899636 | -3.193976 |

|    |           |           |           |
|----|-----------|-----------|-----------|
| H  | -2.569314 | 0.874623  | -2.450853 |
| H  | -0.500411 | 1.010660  | -3.113638 |
| Cl | -2.440516 | 1.412522  | 0.634825  |
| Cl | -2.621581 | -1.888620 | -0.141550 |
| O  | 3.778279  | -1.999964 | -0.173774 |
| C  | 5.154360  | -1.668806 | -0.022883 |
| H  | 5.351115  | -1.219392 | 0.959343  |
| H  | 5.698405  | -2.610508 | -0.108538 |
| H  | 5.486061  | -0.978904 | -0.809963 |

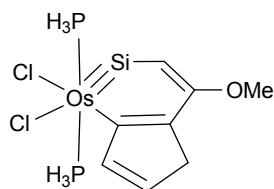

E: -526.406278

|    |           |           |           |
|----|-----------|-----------|-----------|
| C  | 2.301383  | 0.742797  | 0.045626  |
| C  | 0.917900  | 1.004785  | -0.003857 |
| C  | 2.446645  | -1.752447 | -0.366314 |
| C  | 3.005814  | -0.495837 | -0.073086 |
| C  | 0.811644  | 2.480273  | -0.016926 |
| C  | 2.022047  | 3.071004  | 0.063130  |
| C  | 3.091830  | 2.034163  | 0.133788  |
| H  | -0.134186 | 2.999404  | -0.065425 |
| H  | 3.673773  | 2.102027  | 1.065189  |
| Os | -0.835129 | -0.197336 | -0.056288 |
| P  | -0.825827 | -0.681792 | 2.271851  |
| H  | -2.121642 | -0.753083 | 2.842471  |
| H  | -0.262835 | -1.881889 | 2.800227  |
| H  | -0.201186 | 0.256361  | 3.138758  |
| P  | -1.471291 | 0.491974  | -2.237479 |
| H  | -1.938465 | -0.492790 | -3.149420 |

|    |           |           |           |
|----|-----------|-----------|-----------|
| H  | -2.569275 | 1.392159  | -2.254641 |
| H  | -0.571333 | 1.196309  | -3.092590 |
| Cl | -2.066927 | 1.756286  | 0.857212  |
| H  | 2.214501  | 4.139034  | 0.080623  |
| H  | 3.824879  | 2.134623  | -0.679653 |
| Si | 0.699519  | -1.679455 | -0.521661 |
| Cl | -3.041390 | -1.342652 | -0.143543 |
| H  | 3.065184  | -2.631793 | -0.483441 |
| O  | 4.344757  | -0.339616 | 0.084108  |
| C  | 5.214739  | -1.457084 | -0.059928 |
| H  | 5.148503  | -1.886694 | -1.066265 |
| H  | 6.220172  | -1.066768 | 0.104391  |
| H  | 4.996505  | -2.230479 | 0.685521  |

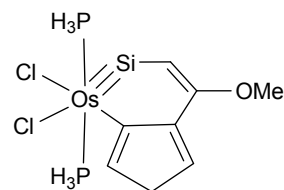

E: -526.391211

|    |           |           |           |
|----|-----------|-----------|-----------|
| C  | 2.392747  | 0.786703  | 0.046692  |
| C  | 0.902798  | 1.072851  | 0.002896  |
| Si | 0.704498  | -1.602319 | -0.618027 |
| C  | 2.481890  | -1.681212 | -0.477562 |
| C  | 3.085989  | -0.498292 | -0.100189 |
| C  | 0.817348  | 2.430610  | 0.026315  |
| C  | 2.159701  | 3.096021  | 0.130441  |
| C  | 3.103188  | 1.943918  | 0.140313  |
| H  | -0.101844 | 2.999104  | 0.032697  |
| H  | 2.373043  | 3.778379  | -0.708705 |
| H  | 4.181867  | 2.027019  | 0.172474  |
| H  | 2.252504  | 3.712300  | 1.039629  |



|    |           |           |           |    |           |           |           |
|----|-----------|-----------|-----------|----|-----------|-----------|-----------|
| Os | -0.868260 | -0.211887 | -0.059241 | H  | 2.215751  | 2.732483  | -0.537589 |
| P  | -0.788389 | -0.738927 | 2.252327  | H  | -1.661914 | 4.106063  | -0.548430 |
| H  | -2.062556 | -0.866698 | 2.863166  | Os | 1.131485  | -0.321107 | -0.037212 |
| H  | -0.172215 | -1.926195 | 2.753524  | P  | 1.894584  | -0.321066 | -2.312218 |
| H  | -0.173578 | 0.208815  | 3.116852  | H  | 3.306449  | -0.252293 | -2.408257 |
| P  | -1.468689 | 0.609244  | -2.203393 | H  | 1.614710  | -1.467232 | -3.099690 |
| H  | -1.967824 | -0.291626 | -3.184514 | H  | 1.513249  | 0.714283  | -3.214144 |
| H  | -2.528747 | 1.554780  | -2.179995 | P  | 1.149787  | -0.561994 | 2.351911  |
| H  | -0.526257 | 1.329501  | -2.996001 | H  | 0.151717  | -1.311288 | 3.039150  |
| Cl | -2.075859 | 1.701939  | 0.924911  | H  | 2.324764  | -1.203078 | 2.810053  |
| Cl | -3.053282 | -1.377359 | -0.164414 | H  | 1.141031  | 0.626106  | 3.130251  |
| H  | 3.062264  | -2.581753 | -0.636749 | Cl | 3.258364  | 0.762854  | 0.565273  |
| O  | 4.410544  | -0.397298 | 0.128323  | H  | 0.851808  | 4.930850  | -0.277377 |
| C  | 5.245378  | -1.541630 | -0.034974 | H  | -1.233837 | 4.028722  | 1.156401  |
| H  | 6.253291  | -1.204308 | 0.209088  | Si | -0.982579 | -0.869458 | -0.246506 |
| H  | 4.949634  | -2.345290 | 0.648757  | Cl | 2.363788  | -2.448062 | -0.039729 |
| H  | 5.218139  | -1.906176 | -1.068169 | P  | -4.145168 | -0.550364 | -0.056175 |

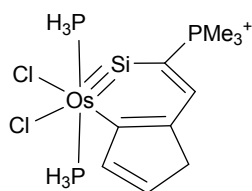

E: -537.333266

|   |           |          |           |   |           |           |           |
|---|-----------|----------|-----------|---|-----------|-----------|-----------|
| C | -1.002470 | 2.116020 | 0.120329  | H | -3.701132 | -2.563372 | -1.353763 |
| C | 0.335553  | 1.592587 | -0.081338 | H | -3.609354 | -2.883574 | 0.401234  |
| C | -2.481462 | 0.058786 | -0.032383 | H | -5.192459 | -2.710716 | -0.393354 |
| C | -2.216038 | 1.457309 | 0.157729  | C | -5.012786 | -0.267588 | 1.540683  |
| H | -3.081918 | 2.108478 | 0.307281  | H | -5.026753 | 0.802333  | 1.767905  |
| C | 1.160500  | 2.778919 | -0.312937 | H | -6.042342 | -0.633673 | 1.481855  |
| C | 0.453411  | 3.926873 | -0.171926 | H | -4.481870 | -0.791710 | 2.339945  |
| C | -0.967114 | 3.636127 | 0.162808  | C | -5.161441 | 0.258388  | -1.358347 |
|   |           |          |           | H | -6.183706 | -0.131186 | -1.335627 |
|   |           |          |           | H | -5.188192 | 1.338571  | -1.188366 |
|   |           |          |           | H | -4.715958 | 0.065419  | -2.337986 |

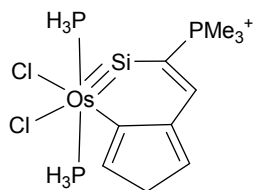

E: -537.304597

|    |           |           |           |
|----|-----------|-----------|-----------|
| C  | -1.036450 | 2.188222  | -0.161772 |
| C  | 0.359206  | 1.666110  | 0.046014  |
| Si | -0.965893 | -0.832607 | 0.350519  |
| C  | -2.492419 | 0.149764  | 0.033005  |
| C  | -2.288690 | 1.497004  | -0.205033 |
| C  | 1.115811  | 2.784912  | 0.215762  |
| C  | 0.324551  | 4.057002  | 0.080894  |
| C  | -1.050294 | 3.563426  | -0.174609 |
| H  | 2.185139  | 2.804412  | 0.372517  |
| H  | 0.353972  | 4.695728  | 0.979077  |
| H  | -1.924867 | 4.192973  | -0.305473 |
| H  | 0.686878  | 4.700148  | -0.738049 |
| Os | 1.150894  | -0.360435 | 0.042974  |
| P  | 1.076868  | -0.621366 | -2.332854 |
| H  | 2.199252  | -1.316618 | -2.846431 |
| H  | 0.026977  | -1.323928 | -2.996581 |
| H  | 1.095132  | 0.566377  | -3.112246 |
| P  | 1.917814  | -0.133269 | 2.301454  |
| H  | 1.731370  | -1.219903 | 3.196483  |
| H  | 3.321675  | 0.046570  | 2.393188  |
| H  | 1.463073  | 0.951319  | 3.104692  |
| Cl | 3.212191  | 0.730145  | -0.669039 |
| Cl | 2.361195  | -2.478062 | 0.121010  |
| H  | -3.148935 | 2.140389  | -0.400249 |
| P  | -4.139958 | -0.562114 | 0.060786  |
| C  | -4.279121 | -1.920323 | -1.166122 |

|   |           |           |           |
|---|-----------|-----------|-----------|
| H | -3.530753 | -2.689090 | -0.950154 |
| H | -5.275844 | -2.369168 | -1.115836 |
| H | -4.106529 | -1.524959 | -2.170932 |
| C | -4.509622 | -1.275342 | 1.711243  |
| H | -4.467992 | -0.487064 | 2.467956  |
| H | -5.505835 | -1.727974 | 1.707540  |
| H | -3.769205 | -2.043793 | 1.953697  |
| C | -5.433365 | 0.680568  | -0.320697 |
| H | -5.273384 | 1.102427  | -1.316637 |
| H | -6.410295 | 0.188698  | -0.296498 |
| H | -5.421338 | 1.480757  | 0.424252  |

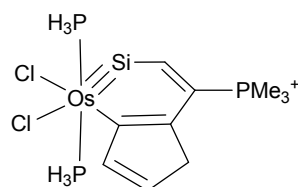

E: -537.310439

|    |           |           |           |
|----|-----------|-----------|-----------|
| C  | -1.724832 | 0.835048  | 0.081529  |
| C  | -0.299152 | 1.038580  | -0.010863 |
| C  | -1.914231 | -1.600560 | -0.588054 |
| C  | -2.432056 | -0.365513 | -0.149924 |
| C  | -0.126132 | 2.499830  | -0.006584 |
| C  | -1.291739 | 3.152384  | 0.175676  |
| C  | -2.410976 | 2.177026  | 0.323680  |
| H  | 0.836974  | 2.978389  | -0.105009 |
| H  | -3.228364 | 2.404734  | -0.376157 |
| Os | 1.370496  | -0.195579 | -0.082162 |
| P  | 2.254690  | 0.705831  | -2.121972 |
| H  | 3.412041  | 1.496300  | -1.912251 |
| H  | 2.717044  | -0.219524 | -3.092000 |
| H  | 1.481004  | 1.579657  | -2.940684 |

|    |           |           |           |    |           |           |           |
|----|-----------|-----------|-----------|----|-----------|-----------|-----------|
| P  | 1.311945  | -1.010078 | 2.174978  | Si | 0.085546  | -1.333909 | -1.217327 |
| H  | 0.902009  | -2.341691 | 2.468063  | C  | 1.917728  | -1.358713 | -0.962822 |
| H  | 2.590381  | -0.982712 | 2.779095  | C  | 2.495867  | -0.281349 | -0.359687 |
| H  | 0.528317  | -0.298457 | 3.124261  | C  | 0.125701  | 2.478247  | 0.220588  |
| Cl | 2.525925  | 1.609956  | 1.141930  | C  | 1.418685  | 3.216002  | 0.385328  |
| H  | -1.426054 | 4.226756  | 0.239256  | C  | 2.429242  | 2.135268  | 0.237545  |
| H  | -2.830485 | 2.251293  | 1.337930  | H  | -0.824357 | 2.983435  | 0.331396  |
| Si | -0.147985 | -1.623158 | -0.759102 | H  | 1.570861  | 4.007734  | -0.366006 |
| Cl | 3.531093  | -1.366151 | -0.151768 | H  | 3.495265  | 2.328408  | 0.247926  |
| H  | -2.553498 | -2.448602 | -0.792114 | H  | 1.490403  | 3.722023  | 1.361664  |
| P  | -4.284575 | -0.371157 | -0.031147 | Os | -1.422069 | -0.203176 | -0.106663 |
| C  | -4.902497 | -2.096061 | 0.099963  | P  | -1.059674 | -1.420585 | 1.915435  |
| H  | -4.419069 | -2.607681 | 0.936115  | H  | -2.259826 | -1.667362 | 2.625600  |
| H  | -5.981411 | -2.056325 | 0.276958  | H  | -0.492179 | -2.729576 | 1.925223  |
| H  | -4.722222 | -2.650674 | -0.823280 | H  | -0.260243 | -0.810976 | 2.921389  |
| C  | -4.965803 | 0.494354  | 1.442657  | P  | -2.424620 | 1.152601  | -1.818717 |
| H  | -4.940538 | 1.576353  | 1.313328  | H  | -3.033410 | 0.486444  | -2.914092 |
| H  | -6.004313 | 0.177260  | 1.577515  | H  | -3.508594 | 1.935741  | -1.345650 |
| H  | -4.388190 | 0.219166  | 2.329271  | H  | -1.661391 | 2.146701  | -2.495915 |
| C  | -5.044564 | 0.339053  | -1.546596 | Cl | -2.365878 | 1.277662  | 1.582138  |
| H  | -6.132949 | 0.239860  | -1.490070 | Cl | -3.552977 | -1.384975 | -0.237007 |
| H  | -4.782019 | 1.393918  | -1.650719 | H  | 2.503026  | -2.225113 | -1.255041 |
| H  | -4.672868 | -0.208302 | -2.417333 | P  | 4.313640  | -0.410939 | -0.021273 |

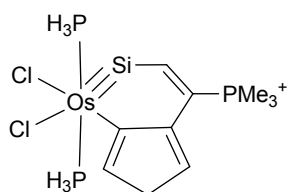

E: -537.289532

|   |          |          |          |
|---|----------|----------|----------|
| C | 1.791256 | 0.946841 | 0.003877 |
| C | 0.290116 | 1.140420 | 0.027437 |

|   |          |           |           |
|---|----------|-----------|-----------|
| H | 4.795390 | -2.428065 | -1.320702 |
| H | 5.934924 | -2.191467 | 0.021510  |
| H | 4.303270 | -2.824365 | 0.351990  |
| C | 5.317281 | 0.621516  | -1.164734 |
| H | 5.107343 | 1.683178  | -1.027940 |
| H | 6.378930 | 0.432199  | -0.977848 |
| H | 5.075488 | 0.341718  | -2.194216 |

|   |          |           |          |
|---|----------|-----------|----------|
| C | 4.691037 | 0.015706  | 1.723092 |
| H | 5.769167 | -0.067629 | 1.890400 |
| H | 4.356468 | 1.028310  | 1.952806 |
| H | 4.167790 | -0.686738 | 2.378471 |

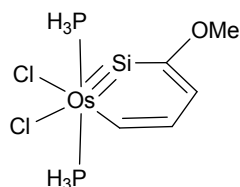

E: -410.877030

|    |           |           |           |
|----|-----------|-----------|-----------|
| C  | -3.073290 | 0.002385  | -0.220138 |
| C  | -3.055093 | -0.043550 | 1.160464  |
| C  | -1.898794 | -0.071312 | 2.017161  |
| C  | -0.567035 | -0.058120 | 1.678779  |
| Os | 0.593634  | 0.001972  | -0.044890 |
| P  | 0.976408  | -2.344455 | -0.163410 |
| P  | 0.949786  | 2.353917  | -0.021340 |
| H  | 2.335536  | -2.698912 | 0.021685  |
| H  | 0.349857  | -3.227576 | 0.763319  |
| H  | 0.689573  | -3.031956 | -1.374359 |
| H  | 0.255800  | 3.187344  | 0.903657  |
| H  | 2.289913  | 2.713460  | 0.267022  |
| H  | 0.730861  | 3.092224  | -1.216048 |
| Cl | 2.304053  | 0.067276  | -1.856146 |
| Cl | 2.419656  | -0.049581 | 1.618242  |
| H  | 0.081133  | -0.087180 | 2.555926  |
| H  | -2.143315 | -0.107405 | 3.078893  |
| Si | -1.411616 | 0.024774  | -0.921721 |
| H  | -4.013835 | -0.061283 | 1.679914  |
| O  | -4.180759 | 0.028991  | -1.026447 |
| C  | -5.455367 | 0.009618  | -0.398454 |

|   |           |           |           |
|---|-----------|-----------|-----------|
| H | -6.186845 | 0.037695  | -1.207712 |
| H | -5.598601 | -0.905523 | 0.191924  |
| H | -5.596078 | 0.883618  | 0.251815  |

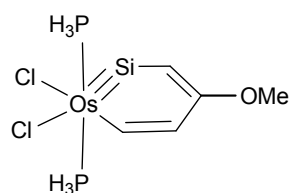

E: -410.898572

|    |           |           |           |
|----|-----------|-----------|-----------|
| C  | -2.870217 | 0.000084  | -1.109728 |
| C  | -3.217844 | -0.000867 | 0.244167  |
| C  | -2.294047 | -0.001836 | 1.352407  |
| C  | -0.923054 | -0.001800 | 1.315508  |
| H  | -3.622643 | 0.000558  | -1.887747 |
| Os | 0.637593  | 0.000044  | -0.068286 |
| P  | 0.996383  | -2.350655 | -0.038082 |
| P  | 0.992874  | 2.351084  | -0.034567 |
| H  | 2.229060  | -2.727603 | 0.552225  |
| H  | 0.106768  | -3.219947 | 0.659486  |
| H  | 1.078867  | -3.047786 | -1.274517 |
| H  | 0.099550  | 3.218646  | 0.660432  |
| H  | 2.222882  | 2.729372  | 0.560515  |
| H  | 1.078871  | 3.049095  | -1.270237 |
| Cl | 2.731028  | 0.002592  | -1.415292 |
| Cl | 1.988946  | -0.001303 | 1.996564  |
| H  | -0.499295 | -0.002637 | 2.321808  |
| H  | -2.794203 | -0.002638 | 2.319585  |
| Si | -1.122984 | 0.000196  | -1.370658 |
| O  | -4.499016 | -0.001055 | 0.668581  |
| C  | -5.559910 | 0.000268  | -0.282551 |
| H  | -6.479366 | 0.000671  | 0.304067  |
| H  | -5.525086 | 0.896490  | -0.912555 |

H -5.526547 -0.895341 -0.913501

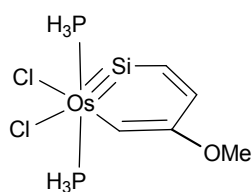

E: -410.878157

C 2.342472 -2.256000 -0.148628

C 3.117517 -1.096116 -0.074974

C 2.660207 0.248183 0.008720

C 1.338757 0.678065 0.035441

Os -0.569438 -0.085792 -0.005688

P -0.942761 0.229400 -2.336410

P -0.910275 -0.085400 2.350050

H -1.964811 1.170670 -2.611510

H 0.098559 0.722250 -3.175024

H -1.378373 -0.872493 -3.121906

H 0.162396 0.203652 3.242912

H -1.863459 0.872809 2.775946

H -1.421981 -1.260624 2.963362

Cl -2.995440 -0.640166 -0.020494

Cl -1.154357 2.315376 0.140719

H 1.310649 1.767977 0.101811

Si 0.604573 -1.935887 -0.130328

H 4.195248 -1.246876 -0.083626

O 3.579263 1.293652 0.072619

C 4.962831 1.021467 0.068872

H 5.272269 0.411684 0.931596

H 5.289139 0.519691 -0.855045

H 5.457905 1.993249 0.132063

H 2.833010 -3.220778 -0.209664

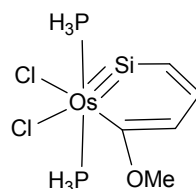

E: -410.886129

C -2.311721 -2.406454 -0.797665

C -3.088716 -1.464749 -0.097732

C -2.787334 -0.148884 0.296251

C -1.567569 0.549804 0.133758

Os 0.385409 -0.118339 -0.104332

P 0.510606 -1.293840 1.961678

P 0.799311 1.369188 -1.911524

H 1.744804 -1.111162 2.632510

H -0.411473 -0.940899 2.984999

H 0.395897 -2.713606 2.037354

H -0.274256 2.015088 -2.592247

H 1.573297 2.503063 -1.550188

H 1.543865 0.896169 -3.025292

Cl 2.817394 -0.580716 -0.325314

Cl 0.975065 1.692017 1.470226

Si -0.669652 -1.819861 -1.027742

H -4.113331 -1.772889 0.125234

H -2.751428 -3.347952 -1.103233

O -1.629042 1.897369 0.168577

C -2.850672 2.617012 0.356916

H -3.595905 2.345456 -0.399238

H -3.260233 2.446137 1.358628

H -2.579547 3.668735 0.254694

H -3.639778 0.401971 0.680844

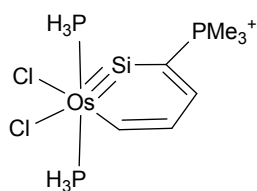

E: -421.815944

|    |           |           |           |
|----|-----------|-----------|-----------|
| C  | 2.481840  | -0.000696 | 0.355300  |
| C  | 2.238937  | -0.003162 | 1.754993  |
| C  | 0.999328  | -0.004281 | 2.400052  |
| C  | -0.282133 | -0.003171 | 1.818443  |
| Os | -1.142405 | 0.000036  | -0.018422 |
| P  | -1.587324 | 2.361153  | -0.169977 |
| P  | -1.587709 | -2.360485 | -0.177997 |
| H  | -2.975043 | 2.633688  | -0.195042 |
| H  | -1.143175 | 3.239528  | 0.857824  |
| H  | -1.134557 | 3.054731  | -1.322555 |
| H  | -1.144362 | -3.242274 | 0.847217  |
| H  | -2.975467 | -2.632622 | -0.204824 |
| H  | -1.134387 | -3.050435 | -1.332537 |
| Cl | -2.512551 | 0.003642  | -2.061048 |
| Cl | -3.181523 | -0.002243 | 1.340912  |
| H  | -1.050941 | -0.004719 | 2.594260  |
| H  | 1.046119  | -0.006238 | 3.487491  |
| Si | 0.973615  | 0.000968  | -0.609846 |
| H  | 3.105053  | -0.004325 | 2.422245  |
| P  | 4.152359  | 0.000445  | -0.260430 |
| C  | 4.153674  | 0.002899  | -2.092895 |
| H  | 3.648767  | -0.890377 | -2.471915 |
| H  | 3.646788  | 0.896036  | -2.469597 |
| H  | 5.186831  | 0.004529  | -2.452518 |
| C  | 5.088159  | 1.477930  | 0.304059  |
| H  | 5.114623  | 1.503386  | 1.397288  |

|   |          |           |           |
|---|----------|-----------|-----------|
| H | 6.113211 | 1.440953  | -0.077196 |
| H | 4.593613 | 2.382866  | -0.059181 |
| C | 5.088698 | -1.478273 | 0.299936  |
| H | 6.113262 | -1.440589 | -0.082561 |
| H | 5.116600 | -1.505989 | 1.393074  |
| H | 4.593608 | -2.382407 | -0.064554 |

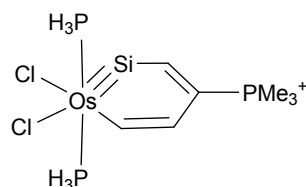

E: -421.806787

|    |           |           |           |
|----|-----------|-----------|-----------|
| C  | 2.118528  | -0.003938 | -1.496112 |
| C  | 2.582088  | -0.000775 | -0.184250 |
| C  | 1.812375  | 0.003006  | 1.013091  |
| C  | 0.421635  | 0.003549  | 1.125288  |
| Os | -1.232698 | -0.000001 | -0.067061 |
| P  | -1.713277 | 2.354163  | -0.012091 |
| P  | -1.710941 | -2.354397 | -0.003789 |
| H  | -2.922391 | 2.631401  | 0.667707  |
| H  | -0.818154 | 3.258805  | 0.626742  |
| H  | -1.914437 | 3.016529  | -1.250653 |
| H  | -0.815144 | -3.255832 | 0.638625  |
| H  | -2.920037 | -2.630312 | 0.676564  |
| H  | -1.911009 | -3.021457 | -1.240009 |
| Cl | -3.437633 | -0.003133 | -1.165995 |
| Cl | -2.346836 | 0.003175  | 2.123304  |
| H  | 0.123764  | 0.006633  | 2.175941  |
| H  | 2.369794  | 0.005663  | 1.950541  |
| Si | 0.327290  | -0.003068 | -1.610519 |
| H  | 2.792859  | -0.006649 | -2.344292 |
| P  | 4.403646  | 0.000505  | 0.094521  |

|   |          |           |           |    |           |           |           |
|---|----------|-----------|-----------|----|-----------|-----------|-----------|
| C | 4.893102 | -1.482360 | 1.056639  | Cl | -1.066632 | -2.376309 | 0.000046  |
| H | 5.972800 | -1.467989 | 1.233671  | H  | 1.111782  | -1.305921 | -0.000223 |
| H | 4.368199 | -1.493353 | 2.015062  | Si | -0.362673 | 2.162833  | -0.000054 |
| H | 4.626792 | -2.381620 | 0.494256  | H  | 1.528973  | 3.930693  | -0.000031 |
| C | 5.323778 | -0.017096 | -1.488240 | H  | 3.310796  | 2.325266  | -0.000132 |
| H | 5.080648 | 0.870871  | -2.077823 | P  | 3.707997  | -0.422641 | -0.000010 |
| H | 6.396275 | -0.017614 | -1.271781 | C  | 3.443770  | -2.234714 | -0.002130 |
| H | 5.075835 | -0.915653 | -2.059493 | H  | 2.889424  | -2.542990 | 0.887739  |
| C | 4.893897 | 1.501972  | 1.026816  | H  | 2.890073  | -2.540888 | -0.893131 |
| H | 5.972274 | 1.487310  | 1.211607  | H  | 4.423277  | -2.722705 | -0.002327 |
| H | 4.634975 | 2.389663  | 0.443022  | C  | 4.721447  | -0.018752 | 1.480111  |
| H | 4.362070 | 1.535682  | 1.980975  | H  | 5.669418  | -0.564232 | 1.446640  |

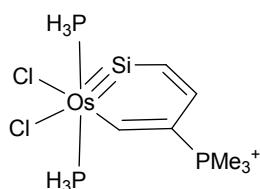

E: -421.820522

|    |           |           |           |
|----|-----------|-----------|-----------|
| C  | 1.282744  | 2.874493  | -0.000071 |
| C  | 2.289226  | 1.935707  | -0.000147 |
| C  | 2.139496  | 0.499611  | -0.000239 |
| C  | 0.948807  | -0.228406 | -0.000176 |
| Os | -1.066703 | 0.092059  | -0.000019 |
| P  | -1.485180 | -0.152421 | 2.353883  |
| P  | -1.485520 | -0.152505 | -2.353849 |
| H  | -2.228795 | -1.321930 | 2.638500  |
| H  | -0.411390 | -0.273160 | 3.282747  |
| H  | -2.261447 | 0.851866  | 2.986288  |
| H  | -0.411868 | -0.273224 | -3.282874 |
| H  | -2.229136 | -1.322049 | -2.638321 |
| H  | -2.261927 | 0.851738  | -2.986151 |
| Cl | -3.527826 | 0.065574  | 0.000179  |

|   |          |           |           |
|---|----------|-----------|-----------|
| H | 4.929995 | 1.054163  | 1.513114  |
| H | 4.170582 | -0.300176 | 2.381926  |
| C | 4.723703 | -0.015772 | -1.477773 |
| H | 4.932483 | 1.057165  | -1.508354 |
| H | 5.671560 | -0.561425 | -1.443881 |
| H | 4.174220 | -0.295367 | -2.380997 |

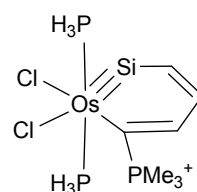

E: -421.811447

|    |           |           |           |
|----|-----------|-----------|-----------|
| C  | -0.161598 | 3.626317  | -0.241375 |
| C  | 1.161910  | 3.297035  | -0.043819 |
| C  | 1.796684  | 2.000198  | 0.042626  |
| C  | 1.259230  | 0.718680  | 0.011878  |
| Os | -0.742940 | 0.014329  | -0.031144 |
| P  | -1.177868 | 0.044691  | 2.330874  |
| P  | -0.912509 | -0.674061 | -2.327502 |
| H  | -1.370992 | -1.253152 | 2.862877  |

|    |           |           |           |    |             |           |           |
|----|-----------|-----------|-----------|----|-------------|-----------|-----------|
| H  | -0.233395 | 0.585840  | 3.251036  | E: | -510.024027 |           |           |
| H  | -2.355402 | 0.707946  | 2.760580  | C  | -2.730793   | -0.173571 | -0.000016 |
| H  | 0.074599  | -0.344562 | -3.302795 | C  | -1.489739   | 0.505764  | -0.000020 |
| H  | -0.977555 | -2.081708 | -2.479168 | C  | -2.148866   | -2.664994 | -0.000171 |
| H  | -2.085539 | -0.263418 | -3.008755 | C  | -3.019401   | -1.559057 | -0.000076 |
| Cl | -2.989653 | -0.999975 | -0.022106 | H  | -2.528323   | -3.678228 | -0.000225 |
| Cl | 0.051072  | -2.284374 | 0.442530  | H  | -4.082634   | -1.809228 | -0.000071 |
| Si | -1.123304 | 2.135127  | -0.302177 | C  | -1.806250   | 1.929068  | 0.000035  |
| H  | 1.862549  | 4.130557  | 0.034587  | C  | -3.150494   | 2.134257  | 0.000043  |
| H  | -0.478645 | 4.659133  | -0.321858 | C  | -3.865641   | 0.831438  | 0.000021  |
| H  | 2.870281  | 2.126051  | 0.124243  | H  | -1.056518   | 2.708744  | 0.000058  |
| P  | 2.711338  | -0.487403 | 0.031186  | H  | -4.521677   | 0.724139  | -0.877652 |
| C  | 2.959008  | -1.334368 | 1.647039  | Os | 0.609013    | -0.172161 | -0.000027 |
| H  | 3.857193  | -1.956467 | 1.579592  | P  | 0.642255    | 0.242037  | -2.375166 |
| H  | 3.113586  | -0.567921 | 2.412808  | H  | 1.879676    | 0.703267  | -2.890412 |
| H  | 2.095089  | -1.948835 | 1.892160  | H  | 0.322029    | -0.768036 | -3.323334 |
| C  | 4.338783  | 0.360554  | -0.221503 | H  | -0.231468   | 1.279852  | -2.785230 |
| H  | 5.100095  | -0.423202 | -0.289071 | P  | 0.641982    | 0.241534  | 2.375204  |
| H  | 4.346027  | 0.935970  | -1.150345 | H  | 0.321426    | -0.768675 | 3.323117  |
| H  | 4.594646  | 1.011228  | 0.617906  | H  | 1.879401    | 0.702439  | 2.890747  |
| C  | 2.694220  | -1.671480 | -1.376691 | H  | -0.231626   | 1.279420  | 2.785329  |
| H  | 2.724109  | -1.098564 | -2.308633 | H  | -3.648307   | 3.098069  | 0.000074  |
| H  | 3.594611  | -2.290663 | -1.315147 | H  | -4.521640   | 0.724096  | 0.877718  |
| H  | 1.810492  | -2.305079 | -1.337079 | Si | -0.517501   | -2.051481 | -0.000227 |
|    |           |           |           | C  | 2.498765    | -0.711111 | 0.000021  |
|    |           |           |           | O  | 3.590526    | -1.059567 | 0.000061  |
|    |           |           |           | Cl | 1.392144    | 2.181252  | 0.000294  |

**Effect of the Ligand on the  
Stabilization for Osmasilabenzyne**

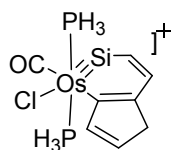

**7a**



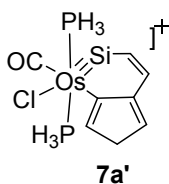

7a'

E: -510.015767

|    |           |           |           |
|----|-----------|-----------|-----------|
| C  | -2.866453 | -0.166534 | -0.054517 |
| C  | -1.519470 | 0.512875  | 0.013447  |
| Si | -0.600990 | -1.951283 | -0.049471 |
| C  | -2.248970 | -2.603402 | -0.130137 |
| C  | -3.166867 | -1.573046 | -0.124544 |
| H  | -2.554438 | -3.642173 | -0.177794 |
| H  | -4.225531 | -1.832295 | -0.171355 |
| C  | -1.789660 | 1.841906  | 0.091633  |
| C  | -3.268368 | 2.124876  | 0.070191  |
| C  | -3.866095 | 0.766965  | -0.026519 |
| H  | -1.052390 | 2.632275  | 0.150541  |
| H  | -3.613915 | 2.660231  | 0.969006  |
| H  | -4.930167 | 0.558521  | -0.063341 |
| H  | -3.565472 | 2.765278  | -0.775706 |
| Os | 0.653147  | -0.177299 | 0.010985  |
| P  | 0.712032  | 0.260882  | -2.363276 |
| H  | 1.950813  | 0.728337  | -2.868841 |
| H  | 0.401955  | -0.740468 | -3.326470 |
| H  | -0.169511 | 1.297088  | -2.758949 |
| P  | 0.559194  | 0.137309  | 2.402171  |
| H  | 1.542976  | -0.462349 | 3.235565  |
| H  | 0.674469  | 1.500067  | 2.776894  |
| H  | -0.617937 | -0.244161 | 3.098818  |
| C  | 2.524922  | -0.703272 | 0.047501  |
| O  | 3.615147  | -1.060153 | 0.075847  |
| Cl | 1.420590  | 2.169321  | -0.043714 |

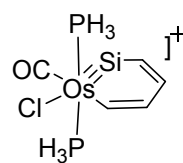

E: -394.501949

|    |           |           |           |
|----|-----------|-----------|-----------|
| C  | -2.690687 | 0.000082  | 1.403827  |
| C  | -1.325369 | 0.000094  | 1.329704  |
| C  | -3.346159 | -0.000108 | -1.052679 |
| C  | -3.629741 | -0.000014 | 0.303908  |
| H  | -4.132520 | -0.000193 | -1.797678 |
| H  | -4.684883 | -0.000040 | 0.582855  |
| Os | 0.270056  | 0.000010  | -0.147348 |
| P  | 0.509489  | 2.377737  | 0.220008  |
| H  | 1.850477  | 2.834825  | 0.231356  |
| H  | -0.096524 | 3.335897  | -0.637425 |
| H  | 0.050703  | 2.813025  | 1.487698  |
| P  | 0.509469  | -2.377660 | 0.220332  |
| H  | -0.096818 | -3.335941 | -0.636774 |
| H  | 1.850421  | -2.834862 | 0.231431  |
| H  | 0.050961  | -2.812662 | 1.488219  |
| Si | -1.593917 | -0.000086 | -1.284043 |
| C  | 1.787684  | -0.000128 | -1.401875 |
| O  | 2.630705  | -0.000312 | -2.177733 |
| Cl | 1.757603  | 0.000112  | 1.814653  |
| H  | -0.833110 | 0.000179  | 2.305683  |
| H  | -3.151733 | 0.000136  | 2.390040  |

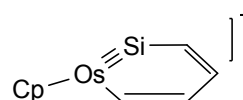

E: -443.279232

|   |          |           |          |
|---|----------|-----------|----------|
| C | 3.338116 | -0.831788 | 0.000141 |
|---|----------|-----------|----------|

|    |           |           |           |
|----|-----------|-----------|-----------|
| C  | 3.532664  | 0.551890  | 0.000149  |
| C  | 2.509640  | 1.530354  | 0.000028  |
| C  | 1.119213  | 1.326145  | -0.000098 |
| H  | 4.193931  | -1.502138 | 0.000263  |
| Os | -0.293866 | -0.138185 | -0.000145 |
| H  | 0.611299  | 2.304938  | -0.000116 |
| H  | 2.860568  | 2.567389  | -0.000003 |
| Si | 1.595351  | -1.231425 | -0.000018 |
| H  | 4.562511  | 0.925877  | 0.000158  |
| C  | -2.448957 | -0.950876 | 0.000816  |
| C  | -2.221076 | -0.146098 | 1.165651  |
| C  | -2.221914 | -0.146943 | -1.164802 |
| H  | -2.655166 | -2.013457 | 0.001300  |
| C  | -1.924097 | 1.192375  | 0.719528  |
| H  | -2.324675 | -0.465891 | 2.193575  |
| C  | -1.924492 | 1.191887  | -0.719809 |
| H  | -2.326436 | -0.467313 | -2.192450 |
| H  | -1.737948 | 2.045847  | 1.358109  |
| H  | -1.739796 | 2.045075  | -1.359188 |

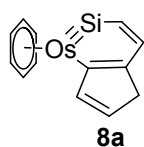

E: -597.462459

|   |          |           |           |
|---|----------|-----------|-----------|
| C | 2.695197 | 0.058517  | 0.004856  |
| C | 1.362637 | 0.561199  | -0.003699 |
| C | 2.390457 | -2.437293 | 0.005782  |
| C | 3.162477 | -1.273845 | 0.009940  |
| H | 2.849873 | -3.417768 | 0.008282  |
| H | 4.248077 | -1.397236 | 0.016415  |
| C | 1.537083 | 2.037352  | -0.010088 |

|    |           |           |           |
|----|-----------|-----------|-----------|
| C  | 2.829649  | 2.414102  | -0.004747 |
| C  | 3.699937  | 1.200094  | 0.005875  |
| H  | 0.710498  | 2.737234  | -0.019425 |
| H  | 4.357042  | 1.173322  | 0.889661  |
| Os | -0.584336 | -0.212152 | -0.004271 |
| H  | 3.204127  | 3.432832  | -0.008116 |
| H  | 4.367943  | 1.165980  | -0.869383 |
| Si | 0.694656  | -1.954781 | -0.013598 |
| C  | -2.161709 | 0.571066  | -1.422785 |
| C  | -2.744276 | -0.501834 | 0.724817  |
| C  | -1.636921 | 1.687831  | -0.707421 |
| C  | -2.129969 | 0.568201  | 1.444122  |
| C  | -1.620164 | 1.685523  | 0.717851  |
| C  | -2.760020 | -0.500160 | -0.691844 |
| H  | -2.142964 | 0.555142  | -2.505516 |
| H  | -1.179546 | 2.503353  | -1.254585 |
| H  | -1.148979 | 2.499019  | 1.256229  |
| H  | -2.087322 | 0.551593  | 2.526128  |
| H  | -3.107039 | -1.369913 | 1.262467  |
| H  | -3.133602 | -1.367587 | -1.223121 |

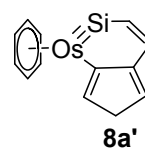

E: -597.442473

|   |          |           |           |
|---|----------|-----------|-----------|
| C | 2.709823 | 0.043338  | 0.251890  |
| C | 1.371415 | 0.619129  | -0.155043 |
| C | 2.217983 | -2.408647 | 0.222381  |
| C | 3.025765 | -1.354157 | 0.508981  |
| H | 2.584606 | -3.422661 | 0.358822  |
| H | 4.032879 | -1.541754 | 0.887788  |

|    |           |           |           |    |           |           |           |
|----|-----------|-----------|-----------|----|-----------|-----------|-----------|
| C  | 1.616678  | 1.933214  | -0.431344 | H  | -3.043153 | 2.475075  | -0.000113 |
| C  | 3.056354  | 2.306992  | -0.203745 | Si | -1.627123 | -1.204187 | -0.002518 |
| C  | 3.660131  | 1.016751  | 0.249286  | H  | -4.673924 | 0.755954  | 0.004537  |
| H  | 0.885308  | 2.656642  | -0.773733 | C  | 2.229577  | -1.048521 | -0.691028 |
| Os | -0.597060 | -0.192470 | -0.165837 | C  | 1.959391  | 0.142551  | -1.431023 |
| H  | 3.167621  | 3.110517  | 0.543110  | C  | 2.222073  | -1.033460 | 0.725575  |
| Si | 0.632577  | -1.949791 | -0.588248 | H  | 2.330802  | -1.992150 | -1.214351 |
| C  | -2.819765 | 0.042827  | -0.654798 | C  | 1.777660  | 1.387585  | 0.700422  |
| C  | -1.873699 | -0.218276 | 1.594654  | H  | 1.924909  | 0.121676  | -2.513283 |
| C  | -2.346749 | 1.398495  | -0.731257 | C  | 1.946659  | 0.174161  | 1.436453  |
| C  | -1.285729 | 1.088941  | 1.464380  | H  | 2.319036  | -1.965257 | 1.270410  |
| C  | -1.614509 | 1.921938  | 0.340155  | H  | 1.549603  | 2.307345  | 1.227265  |
| C  | -2.710524 | -0.704501 | 0.545647  | H  | 1.902785  | 0.177919  | 2.518556  |
| H  | -3.330168 | -0.391707 | -1.506808 | C  | 1.783675  | 1.372408  | -0.724498 |
| H  | -2.499912 | 1.976176  | -1.635563 | H  | 1.562342  | 2.280824  | -1.273347 |
| H  | -1.172528 | 2.908952  | 0.268630  |    |           |           |           |
| H  | -0.640536 | 1.469697  | 2.246749  |    |           |           |           |
| H  | -1.702759 | -0.807230 | 2.487446  |    |           |           |           |
| H  | -3.106651 | -1.712141 | 0.591020  |    |           |           |           |
| H  | 4.711523  | 0.880691  | 0.481299  |    |           |           |           |
| H  | 3.548026  | 2.681329  | -1.116794 |    |           |           |           |

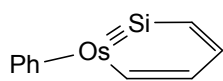

E: -481.952713

|    |           |           |           |
|----|-----------|-----------|-----------|
| C  | -3.378982 | -0.936579 | 0.002136  |
| C  | -3.631678 | 0.431142  | 0.002623  |
| C  | -2.648715 | 1.458845  | 0.000240  |
| C  | -1.263833 | 1.319671  | -0.002249 |
| H  | -4.187472 | -1.658046 | 0.003362  |
| Os | 0.235698  | -0.099489 | -0.001246 |
| H  | -0.793198 | 2.309605  | -0.005009 |

### Effect of the Lewis Base on the Silicon Fragment

NMe<sub>3</sub>

E: -174.471257

|   |           |           |           |
|---|-----------|-----------|-----------|
| C | -0.802171 | -1.133046 | 0.061452  |
| N | 0.000320  | -0.000017 | -0.374238 |
| H | -0.880570 | -1.216626 | 1.164964  |
| H | -0.365225 | -2.063835 | -0.317751 |
| C | 1.382935  | -0.127742 | 0.061603  |
| H | 1.973690  | 0.706141  | -0.333982 |
| H | 1.496621  | -0.133619 | 1.164957  |
| H | 1.808394  | -1.060046 | -0.326394 |
| C | -0.580754 | 1.260867  | 0.061396  |
| H | -1.590060 | 1.365399  | -0.352561 |
| H | -0.653938 | 1.351806  | 1.164417  |

|   |           |           |           |
|---|-----------|-----------|-----------|
| H | 0.025817  | 2.095664  | -0.307331 |
| H | -1.817027 | -1.045233 | -0.343363 |

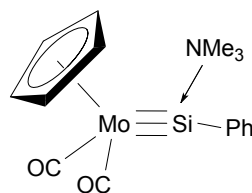

NMe<sub>2</sub>(CH<sub>2</sub>)<sub>2</sub>NMe<sub>2</sub>

E: -347.739059

|   |           |           |           |
|---|-----------|-----------|-----------|
| C | 0.711675  | -0.287863 | 0.973751  |
| C | -0.711675 | 0.287835  | 0.973757  |
| N | 1.480847  | -0.052240 | -0.243372 |
| N | -1.480841 | 0.052244  | -0.243375 |
| H | -0.668040 | 1.373792  | 1.124803  |
| H | -1.219401 | -0.125654 | 1.871865  |
| H | 1.219394  | 0.125596  | 1.871876  |
| H | 0.668036  | -1.373824 | 1.124761  |
| C | 2.798741  | -0.660584 | -0.145625 |
| H | 3.327725  | -0.551846 | -1.098975 |
| H | 3.431658  | -0.214226 | 0.648610  |
| H | 2.699511  | -1.731244 | 0.067762  |
| C | 1.565833  | 1.353095  | -0.614704 |
| H | 0.565858  | 1.738699  | -0.827154 |
| H | 2.039360  | 1.985027  | 0.164529  |
| H | 2.163161  | 1.446443  | -1.528333 |
| C | -1.565847 | -1.353090 | -0.614721 |
| H | -2.163180 | -1.446418 | -1.528349 |
| H | -0.565876 | -1.738701 | -0.827177 |
| H | -2.039383 | -1.985024 | 0.164505  |
| C | -2.798729 | 0.660602  | -0.145614 |
| H | -3.327695 | 0.551925  | -1.098981 |
| H | -3.431664 | 0.214206  | 0.648583  |
| H | -2.699489 | 1.731249  | 0.067837  |

E: -897.792264

|    |           |           |           |
|----|-----------|-----------|-----------|
| C  | 0.871179  | -1.647163 | 1.322194  |
| C  | 3.210429  | 1.285698  | -0.666222 |
| C  | 3.626125  | 0.010486  | -1.138700 |
| C  | -3.083163 | -0.588146 | -1.216517 |
| C  | -2.982972 | -0.703200 | 1.190674  |
| C  | 3.609748  | -0.053091 | 1.164342  |
| C  | 3.201622  | 1.247210  | 0.758301  |
| C  | -2.377463 | -0.325500 | -0.024995 |
| C  | 0.938630  | -1.695730 | -1.339354 |
| C  | -4.246364 | -1.298105 | 1.216192  |
| C  | 3.884769  | -0.821115 | -0.006416 |
| C  | -4.346065 | -1.183287 | -1.194491 |
| C  | -4.932364 | -1.534616 | 0.023363  |
| Mo | 1.533120  | -0.378237 | -0.015479 |
| O  | 0.543036  | -2.411759 | 2.143775  |
| O  | 0.653708  | -2.491925 | -2.145932 |
| Si | -0.616438 | 0.370451  | -0.051415 |
| H  | -2.452985 | -0.551500 | 2.128401  |
| H  | -4.689648 | -1.585310 | 2.166232  |
| H  | -5.913697 | -2.001465 | 0.041582  |
| H  | -4.867356 | -1.381123 | -2.127659 |
| H  | -2.633895 | -0.341522 | -2.176169 |
| H  | 2.955043  | 2.067035  | 1.420190  |
| H  | 3.718723  | -0.393619 | 2.185836  |
| H  | 4.246869  | -1.839877 | -0.031298 |
| H  | 3.753689  | -0.271969 | -2.175543 |

|   |           |          |           |    |           |           |           |
|---|-----------|----------|-----------|----|-----------|-----------|-----------|
| H | 2.967386  | 2.140435 | -1.283748 | C  | -5.580004 | -0.019780 | -0.244915 |
| N | -1.263773 | 2.477108 | 0.002693  | Mo | 1.285411  | 0.007491  | 0.027893  |
| C | -0.052593 | 3.321916 | -0.110903 | O  | 0.918888  | 2.335429  | 2.098496  |
| H | 0.649335  | 3.050375 | 0.679175  | O  | 0.826464  | -2.143812 | 2.261946  |
| H | 0.426137  | 3.139038 | -1.074547 | Si | -0.912389 | 0.015353  | -0.333542 |
| H | -0.321723 | 4.383407 | -0.026961 | H  | -2.974774 | 2.158025  | -0.392132 |
| C | -2.187264 | 2.780612 | -1.116161 | H  | -5.443872 | 2.131402  | -0.347498 |
| H | -3.082160 | 2.163104 | -1.028500 | H  | -6.666514 | -0.027673 | -0.225531 |
| H | -2.471386 | 3.841863 | -1.103451 | H  | -5.409222 | -2.168628 | -0.145033 |
| H | -1.689387 | 2.554638 | -2.062958 | H  | -2.939848 | -2.159836 | -0.189349 |
| C | -1.933055 | 2.739409 | 1.299671  | H  | 2.201166  | 1.327081  | -2.663638 |
| H | -2.241749 | 3.791703 | 1.367958  | H  | 3.530854  | 2.092494  | -0.453414 |
| H | -2.810875 | 2.096954 | 1.390908  | H  | 4.240792  | -0.128257 | 0.910477  |
| H | -1.237970 | 2.514919 | 2.112980  | H  | 3.317697  | -2.269412 | -0.460200 |
|   |           |          |           | H  | 2.066156  | -1.368729 | -2.666932 |

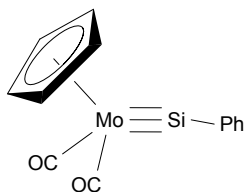

E: -723.304261

|   |           |           |           |
|---|-----------|-----------|-----------|
| C | 1.001995  | 1.454094  | 1.343301  |
| C | 2.533528  | -0.757431 | -1.906475 |
| C | 3.188657  | -1.231938 | -0.739144 |
| C | -3.480029 | -1.216943 | -0.225818 |
| C | -3.499543 | 1.207179  | -0.339704 |
| C | 3.303861  | 1.073175  | -0.737216 |
| C | 2.606027  | 0.669834  | -1.905543 |
| C | -2.769848 | 0.000381  | -0.292851 |
| C | 0.944595  | -1.324066 | 1.443910  |
| C | -4.893194 | 1.195312  | -0.314115 |
| C | 3.667767  | -0.099793 | -0.006302 |
| C | -4.873657 | -1.224847 | -0.200496 |

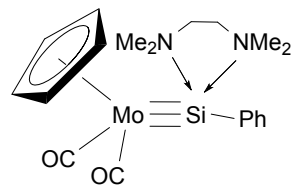

E: -1071.062274

|   |           |           |           |
|---|-----------|-----------|-----------|
| C | 1.600426  | -0.211198 | 2.023518  |
| C | 2.100351  | 2.073483  | -1.346557 |
| C | 2.999524  | 1.052860  | -1.772034 |
| C | -1.404364 | 2.510953  | 0.060156  |
| C | -3.340453 | 1.114960  | 0.215265  |
| C | 3.609503  | 1.704074  | 0.351421  |
| C | 2.480900  | 2.485411  | -0.038388 |
| C | -1.935870 | 1.203820  | 0.118917  |
| C | 2.020036  | -1.751371 | -0.215434 |
| C | -4.159188 | 2.245819  | 0.249411  |



|    |           |           |           |    |           |           |           |
|----|-----------|-----------|-----------|----|-----------|-----------|-----------|
| H  | 0.560201  | 2.901551  | -1.050758 | H  | 3.740607  | 1.423907  | -0.732827 |
| H  | -1.266829 | 3.124621  | 0.000009  | H  | 3.979400  | -0.870058 | 0.687785  |
| Os | -0.708381 | 0.004406  | -0.000180 | H  | 2.165702  | -0.837523 | 2.685388  |
| C  | 3.216478  | 1.262452  | 0.000146  | H  | 0.732629  | 1.454228  | 2.448726  |
| C  | 3.924546  | -0.713581 | -1.215211 | H  | -1.715285 | -0.877122 | -1.832572 |
| H  | 3.911824  | -1.805013 | -1.219267 | H  | 2.019924  | -3.044339 | -1.133061 |
| H  | 3.399325  | -0.349696 | -2.100400 | H  | 0.607424  | -2.247174 | -2.499480 |
| H  | 4.963630  | -0.357490 | -1.225027 | H  | 2.631325  | -1.601391 | -2.549363 |
| C  | 3.923064  | -0.713481 | 1.216359  | Os | 1.190498  | -0.065362 | -0.079160 |
| H  | 3.910281  | -1.804916 | 1.220582  | C  | -1.918307 | 2.345995  | 0.349607  |
| H  | 4.962162  | -0.357464 | 1.227343  | H  | -1.863735 | 1.879594  | 1.332977  |
| H  | 3.396813  | -0.349453 | 2.100882  | H  | -0.914068 | 2.678149  | 0.083863  |
| H  | 4.245766  | 1.643317  | 0.000921  | H  | -2.610140 | 3.198774  | 0.377438  |
| H  | 2.692837  | 1.615005  | -0.889355 | C  | -2.348920 | 2.009587  | -1.998607 |
| H  | 2.691535  | 1.614900  | 0.888911  | H  | -2.656042 | 1.287146  | -2.757731 |

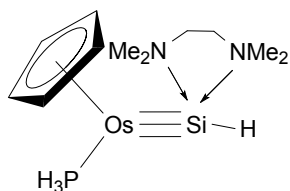

E: -645.122314

|    |           |           |           |   |           |           |           |
|----|-----------|-----------|-----------|---|-----------|-----------|-----------|
| P  | 1.578610  | -1.739554 | -1.571686 | H | -1.615249 | -2.298860 | 1.940617  |
| Si | -0.890379 | -0.194036 | -0.781678 | H | -1.874653 | -0.677237 | 2.565140  |
| C  | 3.253240  | -0.087755 | 0.868688  | H | -3.134424 | -1.927242 | 2.816714  |
| C  | 3.118649  | 1.121105  | 0.097749  | C | -3.556513 | -2.284245 | 0.141211  |
| C  | 2.047575  | 1.876534  | 0.674272  | H | -2.797133 | -3.056736 | -0.011351 |
| C  | 1.524415  | 1.132025  | 1.786382  | H | -4.396881 | -2.721111 | 0.711368  |
| C  | 2.277860  | -0.088794 | 1.914334  | H | -3.925067 | -1.985595 | -0.844665 |
| N  | -2.954249 | -1.146310 | 0.827854  | H | -4.033391 | 0.252593  | -1.247078 |
| N  | -2.360619 | 1.355951  | -0.663329 | H | -4.429266 | 1.707830  | -0.321019 |
| H  | 1.722543  | 2.855568  | 0.349122  | H | -4.893433 | -0.261322 | 1.042622  |
|    |           |           |           | H | -3.552864 | 0.620466  | 1.760394  |

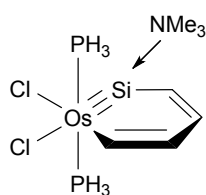

E: -470.887636

|    |           |           |           |
|----|-----------|-----------|-----------|
| C  | 2.121028  | 2.282553  | -0.040708 |
| C  | 1.141073  | 3.283368  | -0.074072 |
| C  | -0.271291 | 3.165200  | -0.076657 |
| C  | -1.046535 | 2.003469  | -0.046614 |
| H  | 3.159641  | 2.599075  | -0.038960 |
| Os | -0.669820 | 0.036924  | -0.008712 |
| P  | -0.939313 | -0.332404 | -2.332097 |
| P  | -1.094632 | -0.195272 | 2.313389  |
| H  | 0.095946  | -0.921807 | -3.116587 |
| H  | -2.004700 | -1.214452 | -2.644499 |
| H  | -1.259520 | 0.753656  | -3.200338 |
| H  | -0.068322 | -0.151165 | 3.309203  |
| H  | -2.006044 | 0.714737  | 2.915988  |
| H  | -1.695431 | -1.430638 | 2.665183  |
| Cl | -0.311979 | -2.540306 | -0.016763 |
| Cl | -3.177774 | -0.279623 | 0.023271  |
| H  | -2.121268 | 2.229029  | -0.048755 |
| H  | -0.802640 | 4.117460  | -0.102384 |
| Si | 1.460489  | 0.636151  | -0.002397 |
| H  | 1.508382  | 4.312308  | -0.098887 |
| C  | 2.946962  | -1.518568 | -1.134186 |
| N  | 3.040703  | -0.621493 | 0.063160  |
| H  | 3.771326  | -2.240840 | -1.107019 |
| H  | 3.025013  | -0.914555 | -2.042017 |
| C  | 4.359588  | 0.066725  | 0.079090  |

|   |          |           |           |
|---|----------|-----------|-----------|
| H | 4.421939 | 0.712571  | 0.956794  |
| H | 5.163261 | -0.677701 | 0.113484  |
| H | 4.462887 | 0.673931  | -0.822026 |
| C | 2.885631 | -1.458635 | 1.296653  |
| H | 1.927373 | -1.982256 | 1.240806  |
| H | 3.709236 | -2.180534 | 1.347044  |
| H | 2.917346 | -0.810533 | 2.176349  |
| H | 1.986374 | -2.040909 | -1.100883 |

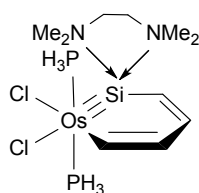

E: -644.166718

|    |           |           |           |
|----|-----------|-----------|-----------|
| C  | -1.702288 | -0.038955 | 2.307803  |
| C  | -0.715655 | 0.044807  | 3.272682  |
| C  | 0.709273  | 0.144597  | 3.138438  |
| C  | 1.458724  | 0.160722  | 1.977356  |
| H  | -2.730866 | -0.094697 | 2.663921  |
| Os | 1.021030  | 0.003381  | 0.006200  |
| P  | 1.435826  | -2.309406 | 0.153583  |
| P  | 1.498329  | 2.295759  | -0.324565 |
| H  | 1.516606  | -3.068089 | -1.051950 |
| H  | 2.695513  | -2.642332 | 0.719601  |
| H  | 0.634917  | -3.225782 | 0.910210  |
| H  | 0.640861  | 3.390487  | 0.036534  |
| H  | 2.669101  | 2.768546  | 0.326968  |
| H  | 1.785041  | 2.712272  | -1.655892 |
| Cl | 0.536176  | -0.226852 | -2.558971 |
| Cl | 3.524641  | -0.023157 | -0.440136 |
| H  | 2.535482  | 0.259860  | 2.176196  |



|    |           |           |           |
|----|-----------|-----------|-----------|
| H  | 1.241713  | 0.220620  | 4.088246  |
| Si | -1.143308 | -0.002570 | 0.581473  |
| H  | -1.061166 | 0.043072  | 4.310894  |
| C  | -3.757517 | 0.719122  | -0.631374 |
| C  | -3.386236 | -0.599948 | -1.288007 |
| N  | -2.515423 | 1.448362  | -0.266629 |
| N  | -2.541718 | -1.397252 | -0.356979 |
| H  | -2.798620 | -0.425491 | -2.192735 |
| H  | -4.284488 | -1.166018 | -1.568732 |
| H  | -4.377238 | 1.327153  | -1.303909 |
| H  | -4.332171 | 0.551351  | 0.284016  |
| C  | -2.816305 | 2.510968  | 0.727909  |
| H  | -1.883572 | 2.992906  | 1.025611  |
| H  | -3.491245 | 3.258035  | 0.290455  |
| H  | -3.269104 | 2.068277  | 1.615374  |
| C  | -1.913719 | 2.074349  | -1.484919 |
| H  | -1.406144 | 1.329451  | -2.103803 |
| H  | -2.694660 | 2.600469  | -2.048906 |
| H  | -1.165583 | 2.797841  | -1.166470 |
| C  | -3.380840 | -2.090184 | 0.655624  |
| H  | -2.732037 | -2.551612 | 1.401055  |
| H  | -4.032421 | -1.382129 | 1.168368  |
| H  | -3.994918 | -2.857233 | 0.166385  |
| C  | -1.800538 | -2.424809 | -1.143557 |
| H  | -1.280071 | -3.089436 | -0.452860 |
| H  | -2.514231 | -3.019105 | -1.729420 |
| H  | -1.078317 | -1.926304 | -1.797882 |
